# Supplementary material for: Genome-Wide Analysis of the Cyclin Gene Family in Tomato
Source: MDPI journal article supplement (doi:10.3390/ijms15010120), 2013-12-23
Supplement: s1 [file s1]

>SlCycA1;1

MMTTQNKRSSAEAKRQAMAANSSGLEHNQTGKLNAKKRPALSKISNNTTVSARNVSHS  
SKLAPCTSKIVNIKKNTSACNSNAVSSGTAVLPASSSVRPSSKPVSIQRSDAVVPKITVIPVPA  
TCSMDISPSHSDGSLVSMDESMNSDTVRSPEVEYIDDHELA AVDSIEKKACSTLYISEHVK  
AAAADICKRDVLDLKS GDKIMNIDNNLVDPQLCATMACDIYKHLRASEAKKRPSTDFM  
AKVQKDINPSMRAILIDWLVEVAEEYRLVPDTLHLTINYIDRYLSGNLMDRQRLQLLG VAC  
MMIASKYEEICAPQVEEFCYITDNTYFKEEVLQMESAVLNYLKFEMTAPTAKCFLRRFVR  
AAQGLNEVLSLQLEHLASYIAELSLLEYNMLCYAPS LIAASAIFLAKYILLPSVKPWNSTLR  
HYTLYQPSDLRDCVLALHSLCCNNNNSSLPAVREKYSQHKYKFVAKKYCPPTVPVEFFQN  
ISS

>SlCycA2;1

MKRENSVISA AIEPMVRVTRSRAAVSEKSMVASTGELPKQRGQKRALQISSDPAILRVRNK  
NVPLTSCVEQKCRPVLDVTNLCCNTSNGDAVKVPK KKKIMRVGNSSMNVSTTSVDPEV  
SQFPAKLPPRSSLNQSCSDRKSHEQQGNAVEIKGFPRKSIVRKAVPDAALSTSTKLD FIDIDS  
DKKDPLQCSQYAHDIYNNLRVAELIRWPLSNFMETLQRDITESMRAILVDWIVEVSEEYNL  
VPDTLYLAVHFIDLFLSKNYVERKNLQLLGITCMLVASKYEEMCGPRVEEFCFITDNAYTK  
NEVLAMEILVLNFLGFRLSTPTAKTFLRRFIRAAQASYKNPNLELEFLANYLTELTLLEYGF  
LKFTPSAIAASSVFLARWTL DQSSHPWSPTLEHYTY YKAQHLKTTVIALQGLQLNINNCLL  
NVIRAKYRQEKFKSVACLSSPKLLET L FQT

>SlCycA2;2

MRITRARA KTLGSSGGLPPLHPSVRQDKKQGLVTQGT KSKRPAPDENKPANSSSTASQQP  
KRRAVLRDVTNVL CENPYMNCINGSKFQVKKFSDKRNSKVTPALLVKKPELED RKESVIE  
EAKMVKVEESQEHC SQAHFKDHPFTQPSEYITAAQSG LVDLMPVNRSSCNDITLQTTTPK  
DESKVCLKQEGSNSLSIADIDSKHKDPLMCSLYAPDIYNNLQAMELDRRPSFN YMEKLQR  
DINKGMRSILIDWLVEVSEEYRLVPDTLYLTVHLIDRFLSEHYIEKQKLQLLG VTCMLIASK  
YEEICAPRVEEFCFITDNTYSKEEVVRMESLVLNFLGFQLAAPT TTKFLRRFVQASQASYE  
VPSVELEFMANYLAELTLAEYSFLKFLPSVTAASAVFLARWTL DQSNHPWNSTLEHYTTY  
KASDLKTTVLLLQDLQMNTSGSTLNAIREKYKQPKFKSVATLSSPKPVQSLF

>SlCycA3;1

MADQENFVRVTRLAKKRAAEAMVQQLQQPNKKRVVLGEIQDLSNEGIIKS RKTIKRKVK  
RSVAEKDKESDVDVNLDDDPQMC GAYASDIYDYFHQLEIEKKRRPLPDYLEKVQKDVSA  
NMRGVLVDWLVEVAEEYKLLSDTLYLTVSHIDRFLSVNVIPRQRLQLLG VSSMLIAAKYEE  
IKPPHVKDFCYITANTFTKKDVVKMEASVLQSLKFEMGSPTTKTFLRRFTRVAQEDVKNP  
DLQFEFLGYylaELSLLDYNCVKFLPSLVAAVIFLSRFTLHPKAHPWSLALQRCSGYRAA  
DLKECVLIVHDLQLSRRGSTLA AVRDKYKLHKFKCVSTLSSPLEIPDSFFEGTV

>SlCycA3;2

MVDSENCGRVTRLAKKRAAEGMAPQEQR RASKKRVVLGEIQNFSIVGVKQIKGVEGKIQ  
KPKSKKKVKRVVASKTVEEKEVSVVVDDDDVDDPQMCTAYVSDIYDYLRKMEIDEKR  
RPLPDYLEKVQKDV SATMRGILVDWLVEVSEEYKLLSDTLYLTVSYLDRFLSTNVITRQKL  
QLLG VSSMLIAAKYEEISPPHVEDFCYITDNTYTKEEVVKMEADV LNSLQFEMGNPTVKT  
FLRRFTGIAQEEYKTPNLQLEFLGYLSELGLLDYCCVKFLPSLVAAVIFLSRFTLQPN AH  
PWSAALQRYSGYKASDLKECVLILHDLQLSRRGGS LVAVRDKYKQHKFKCVSTLTS LVEIP  
ASFFEDTRQL

>SlCycA3;3

MADQENAVRVTRLAKKRAAEAMVQQLQQPNKKRVVLSEIQDLCNVGINQIEDKVVFVSEP  
LRPKCKQIIKRELKTSDDDPQMCTAYASDIYDYLHQMEIEKKRRPLPDYLEKVQKDVSTN  
MRGVLVDWLVEVTDEYKLLSDTLYLAVSYIDRFLSVNVIPRKKLQLLGVTSMLIAAKYEEI  
KPPSAEDFAYITDNTFTTKDVINMEASVLQSLKFEMGNPTTKTFLGRFTRIAQEGYENPDL  
QLEFLGYylaELSLLDYNVCVKFLPSLVAAAVIFLSRFTLQPKSHPWSLALQCCSGYRPVDL  
KECVLIHDLQLSRRRSNLSAVRDKYKLHKFKCVSTLSSPLEIPDSFFEDTRE

>SiCycA3;4

MEQQTMAHQENFVRVTRLAKKRAAEAMVQQLQQPNKKRVVLTEIQDLCNVGINQIEDK  
VFVSEPLRPKCKHIIKRLKISDDDPQMCTAYVSDIYDYLHQMEIEKKRRPLPDYLENVQK  
DVSANMRGVLVDWLVEVTDEYKLLSDTLYLAVSYIDRFLSVNVIPRKKLQLLGVSSMLIA  
AKYEEINPPDVGEFCYITDNSYSKKEMVKMEADVLCCLKFEMGNPTIKTFLGQFNKIAQE  
DYKKNNLQVEFLGYylaELSLLDYNVCVKFLPSLVAAAVIFLSRFTLQPMShPWSMALQRC  
SGYRPVDLKECVLIHDLQLSRRGSTLEAVRDKYKLHKFKCVSTLSSPLEIPDSFFEDTRQ

>SiCycA3;5

MADQENFVRVTRLTKKRAAEAMVQQLQQPNKKRVVLSEIQDLCNVGINQIEDKVVFVSEP  
LRPKCEQIIKRELKTSDDDPQMCSAYASDIYDYLHQMEIEKKRRPLPDYLEKVQKDVSA  
MRGVLVDWLVEVTDEYKLLSDTLYLAVSYIDRFLSVNVIPRKKLQLLGVSSMLIAAKYEEI  
NPPDVGEFCYITDNSYSKKEMVKMEADVLCCLKFEMGNPTIKTFLEQFTKIAKQDHKK  
NLQLEFLGHYLAELSLLDYNVCVKFLPSLVAAAVLFLSRFTLQPKSHPWSLALQRCSGYRPG  
DLKECVLIHDLQLSRRGRTLALRDKYKLHKFKCVSTLSSPLEIPDSFFKDTR

>SiCycA3;6

MVDEENKVPATAAASRGSNKRAFDSIAITNENDPLQISERPYPANKKRVVLGELNNLGNVI  
VSTQNSDLTETHESKRKIKLRKTRNVVKETVELETANSSPKDNLQKCSYGPIYQHLHSL  
EVEERRRPLSNYMEKVQNNVIPSMTVLVDWLVEVTEEYKLVSDTLYLAVSYIDRFLSSH  
VLAMEKLQLLGVSCMLVASKYEEISPPHVEDFCYITDNTYTREEVNMERDLSFLNFEIS  
SPTTITFLRIFLKAQDNLSFLTQFEFLSCYLAELSLLDYSCVRFLPSMTAASAIFLSRFTVL  
PEVCPWTLALQQCTGYKPSSELKDCVLVIHELQSSLMEATGRALREKYMNHKYKCVAALH  
PPDIPSCFFDDA

>SiCycB1;1

MASRNVLQHQNKGVLVPGVLKQKKNMVAEGRNRKALGDIGNLATGYGAEGKPLPQKS  
VAVNVKVANVANGAQKVPVGRKPAQKKVTVPKPEEIIISPDTREKLMEKKMLRKKQA  
AEDITKKKSTLTSTLTARSKAACGLSKKPKEHIVDIDAADVNNELAVLEYVEDIYNFYKLA  
ETETRVHDYIDSQPEINEKMRAILDWLIEVHHKFELNPETLYLTINIVDRYLTVETSSRREL  
QLLGISAMLIASKYEEIWAPEVNDVFCIADKTYSHDQVLAMEKQILGKLEWYLTVPPTYV  
FLVRFIKASLPDSEMENMVYFLAELGLMNYATIYCPSMIAASAVYAARHTLNRTPFWNGT  
LKLHTGFSESQVIECSRQLVSYHSEAANHKLKVIYKKYSNSERGAVALPPAKSLLTASSS

>SiCycB1;2

MAARNVLQQQNRGEAVPGAQKQKNMAGAQRNRKALGDIGNMVTVRGGVEGGKPLPQ  
VSRPITRSFCAQLLANAQAADNQKKSMVVNGDGPIVANGALPVKAAPAARKPAQKKAA  
IVKPMPEVIEISPDTVEQVKENKQKKKAANDSSMKKAATLTSTLTARSKAACGLSHKPKN  
QIVDIDATDVNNELAVVEYVEDIYTFYKIAENESRIHDYMDSQPEINEKMRSILIDWLIEVH  
QKFELNQETLYLTINIVDRYLAVTTTSRRELQLVGMSAMLIASKYEEIWAPEVNDVFCISDR  
AYDHEQVLGMEKRILGQLEWYLTVPPTYVFLVRFIKAAVSDAQANVTVLNSCNVTSMEN  
MVYFLAELGLMNYATNSYCSSMIAASAVYVARHALNCSPFWNETLKLHTGFSESQLLGC

AKLLVSYHMEAPQHKLRLVIYRKYSSSHRGAVALNPPAISLLGSS

>SiCycB1;3

MANGDAVPKILPKGGGGGEVKKKNGQANGRTRRALGDIGNIVTGPVGAKPQTKVSHPI  
TRRSAAQLIAKGQEPVQKNKTKPLVTKGVAARKVGVPKAEAIKKDYVKAKAGTISGICP  
EEDVKTIEKIPLKERKVRKSGKTLTSILTARSKAACGLSNKPRSQIVDIDAADIDNHLAGE  
YVEDIYKFYKLTE DENRPCDYMDSQPEINDRVRAILVDWLIEAHKRFELRPESLYLTVNIM  
DRFLSEEPVPRRELQLLCISSMLIASKYEEIWAPEQVNDFLTITDNAYVRDQILLMEKVILG  
KLEWYLTVPPTYVFLVRYIKA AVPSDQEMENMTFFLAELGLMNYTTVISYCPSKIAASAVY  
AARSTLNRSRWTDTLKHHTGYTEDQLRECAKQLVSFHFGAENKLLKAVYRKFS SPDRC  
AVALLPPARDVHIGSS

>SiCycB1;4

MDHHNKAVVPHNLPRGGDMGGKQKIGQVAGKNRRVLGDIGNLVIAPAVEGKPKTQVTRP  
ATRSFCAQLLANAQAEKNKKPLAEVVNKVATTKVQVKKKASDNLAPETVIVISPDKEVK  
QSPLSSRRKTKKSGKTLTSTLTARSKAACGVANRPKIDDIDAADVDNHLAAVEYVEDIYNF  
YKLTEDEGRVNDYMDFQPELNHKMRAILVDWLIEVHRKFELMPESLYLTMNILDRFLSVK  
TVPRRELQLVGISSMLIACKYEEIWAPEVNDFIHISDNAYARDQILQMEKAILGKLEWYLT  
PTPVVFLVRYIKASTPNDQEMENMAFFFAELGLMNYKTIITSCPSMLAASSVYAARCTLNK  
SPLWTQTLQHHTGYSEDQLMESGKELVSCHLGAAENKLLKAIYRKFS SPDRGAVALFPPAK  
NLSPTNANTTTSS

>SiCycB2;1

MDQNKFTNVQGGNAQIVKIGGERTQNRRLSVINQNLVGAHRYPCVVNKRELSEKFGAT  
QIGTLRQHYLEMEDVFEEALIDIDNDDAKNPLAGVEYVGDLYAYYRKMEVYSCVLTNYM  
EQQSEINGNMRGVLDWIIIEVHDKFELKEETLFTVNLLDRFLEKQVVAKNKLQLVGLVAF  
LIAGKYEEILPPLVQELVIISYENYNKKDVIEMEKLMLNTLQNNMSFPTAYVFMRRFLKAT  
QADKKLEELSFFLIELCLVEYEMLMNSSSFMAAAEIYTAQCTLYGVKEWSTTCEWHIGYS  
QESLMKCTKLIVMYHDKAKTGGLIRVHNKNYNASKFGYVAKVEPTYFLVQDS

>SiCycB2;2

MCKMNERWNAQIVKIGGERTQTRRLSVINQNLVGAHRYPCIVNKRELSQKFGATLIGTL  
HQHYLEETKKPKPAIGDFTIWEHDTNEAQPVPMCLEQPESFSNDKEVEIEMEDVFEEALI  
DIDNDDAKNPLAGVEYVGDLYAYYRKMECAELLKISALLR

>SiCycB2;3

MVGQNRRLSKINRNVMGGPPLHTAVVPKRNDITENKVNAATNKIPPVLIHRPVTRKLAA  
QISSQQRHPAVEVHTFKESEDCHIIAEDYKTTSSNSSVSMFVQHTEAKTEEIDRMVIVEYTD  
DIYAYYKKAIEVSCVPPNFM

>SiCycB2;4

MGAPPLHCAVVHKNRNDITENKASAANKIPPVPIHRPITRKLAAQIASKQHQPAVEVTKPPV  
PVVPVRNESEDCHIIAEDYKTTGNSSVPMFVQHTEAMMEEIDRMDEEIEMEDAEDWSIV  
DIDSPDKKNSLAVEYIDDIYAYYKSEIVSCVPPNYMEQQFDINERMRGILIDWLIEVHYK  
FELMEETLYLTVNLIDRFLAVQSVIRKKLQLVGITAMLLACKYEEVTPVVEDLILISDRAY  
TRKEVLEMEKLMVNTLQFNMTVPTVYAFMRRFLKAAQSDKKVELVSFFLIELCLVEYEM  
LRFPPSMLAAAAIFTAQCTLGVSKEWNKTCEKHSSYVKDQLLECSKLMVCFHQKAAIGKL  
TGVHRKYSTSKYGYATRCEPASFLLEAWF

>SiCycB2;5

MVGSNENSQGVVRPSILRGVMGNRRRALSTINGNIVEAPQYPCKLRKKNGVTDKYVDGE

MNPIHRLVTRKYAAQVADKRQQPSLEVTKPVVETAPNGNELEGAINTDVEDYKATSDYV  
VPMSVQHTEAMMEEIDRMDEEIEEMEEIEKALIVDIDRADKKNVLAAVEYIDDIHAYYKKIE  
SSACAPPNYMEQQFDINERMRAILIDWLIEVHYKFELMEETLYLTVNLDLFLAVQPVVRK  
ELQLVGVTALFLACKYEEVSVPVVQDLILISDKAYTGMEVLEMEKLMINTLQFKLSVPTPY  
MFMKRFLKAAQSDKKVELLSFFMTELCLVEYETLRFPPSMLAAAAIFTAQCTLGVAKEW  
KTCEKYSKYTRDQLECSKLMVTFHQKAATGRLNAVHRKYSISKYGFVAKMFPPASFLE  
ASFF

>SiCycB2;6

MAITDENKHPLIKESSVRVKDRAEMATRKVVGVETRSNRRVLGAINQNLVGGQGYPCVV  
NKRGLSDGNGFCDKNLPVHGHRPITRKYAAQIASSQKHSSEENKKPKIAAESFSVWEDDM  
EAANDKPVPMSLEQTEKVSKGKDQMTYIQEVEMEDIFEEAVIDIDGDDAKNHLAAVEYV  
GDLFANYRTMEVNSCASPYYMAQQADINERMRSILIDWLIEVHHKFELREETLFLT  
VNLDLRFLEKQGIVRKKLQLVGLVAMLLACKYEEVCAPLVEDLVLISDKAYTRKEVLE  
MESMMLNTLQFNMSVPTAYVFMRRYLKAAQCDRKLELLSFMLVELCLVEYEMLKFP  
PSFIAAAIYTAQTTLYG  
VQQWSKTCEVHTTYS  
EDQLECSRSIVGYHQKAATGKLTGVHRKYSISKFGY  
AAKCEPAHFLVQQTQE

>SiCycB2;7

MGVSNENNPIMTKPTNGQEMGNRKFVETRNNRRALGVINQNFVGVNQYPCVVNKRGI  
SETNGICNKNPPIPAH  
RPITRKFAAQIASSQQHYTEETKKPKLAAESFSVWEDVPIIDVDEY  
EAAKDQPVPM  
SLEQTETVSHDNKTQMEIEMEDIFEETAIDIDSDDAKNPLAAVDYVEDLYA  
YYSKMEVSSRISPDYMAQQFDVNERMRSILIDWLIEVHHKFDLREETLFLTVSLID  
RFLEKQSVVRKKLQLVGLVATLLACKYEEVTLPVDDLVFISDKAYERKEVLELEK  
LMLNTLQFNMSVPTPYVFMRRFLKAAQSDRKLELLSFFLIELCLVEYEMLKFP  
PSFIAAAIYTAQCTLYSVKQWSTTCELHTKYSEDQLECSRLIVGFHKNAATGKLT  
GVHRKYNTSKFGHAAKCEPAHFLLEQNQ

>SiCycB3;1

MGKLNSQKHKSIQNGGIRELKIYEEADKIKYQSRDSLSSRCKGKSGVL  
SMIDVQTSQKNLKSDIKNEEKTKEKCSTSVKIFVKRKVLTDISNIRGNSLRTKSYN  
SSKLVDSDNKWSRITNNSSRNFIMGNVRTNMNGATGDEEILTRAPFKDTKASFEG  
PKTKIQGRKSVTIGIRSTRRNALPPSRRSLLTLQQVNVD  
DTNYKEKG  
NLRNLSGATGDRQILTQAPFKAVKAPFDGPKTKTQGS  
KSATIGISLILSVWLLRTTGRNALPPSRRSLPVLEQVNTKGTHNKAKENPK  
ELEKGKGINGVPVLAKLKAAGDVL  
PQLSNHNNIRNRVSDASARMAPKGHTKAEIGALRKKS  
VKTVLKISARGLNSQPFSKSSSMSNVHKCTSRVAIPYKRLEDVSTSSLSKYATSDISAEQPHQKEV  
VSSNGSLDTPECSIARRKSYRRKSFTCLLMARSKFLKEQCGSVKLENLSNIYDNCNHLE  
VTEYVDDIYLYYWVIEAQNQPIKNYMEIQKEITPQMRGILINWLIEVHLKFDLMQ  
EALFLMVTLLDYYLSLVRVKKNDLQLVGLTSLFLASKYEDLWHPRIIDLLSISGESYTRDQ  
MLDMEKDILRKLKFRLLNAATPYVFMRLLLKAAQADTRFEHLAFYLI  
ELCLVEYEALNYKPSMLCASAIYVARCTMQVMPAWTPLLGMHARYQESQLRQCAEMILRFHKSATTALLKV  
THEKYMCS  
SNGKVASIRPLESLP

>SiCycC1;1

MAANFWISSQYKELLDQEEVDVVHQLDKERGITLDDFKLIK  
LHMSNYVARLAQNVKVRQRVVATAITYMRRVYVRRSMTEYDPRLVAPTCLYLASKAEESTVQARLLV  
FYIKKLYSDEKYKYEIKDILDMEMKVLEALNYLVVYHPYRSLAQFLQDAGMNDATQLTWGLINDTYKMD  
LILIHPPHLITLACIYIASVLKDKETTAWFEELRVDMNVVKNIAMEILDYYDGHR  
SISDERV

NAAMSKLAGR

>SiCycD1;1

MSVSYSDCFSDLLCGEDSDTVFSNGRGEDLPECSSSDIESQFADIDESIAGLIEDEQNFVPGF  
DYIEKFQSQSLSAARDESVAWILKVQRHYAFQPLTAYLAVNYFDRFLYLRLSPQTNGWPL  
QLLSVACLSLAAKMEEPLVPSLLDLQVEGAKYIFEPKTIQRMFLVLRILDWRLRSITPFSFL  
SFFAAKLDSLGTFTAFLISRASQIILSNIEASFLEYWPSCIAAATILCAANDLPNFSLVNAEH  
AESWCHGLRKDKIVGCYELVQKYAIALRPRRFPRVYPQVRVMTRASTTTTTAVASSDCSSS  
SSSSSTS YKRRKLNNRWWSTTDEDS

>SiCycD2;1

MAPTRDFVISGLFCAEYNKSMLENVYDDIHTLFHGDHQNQQTMPFQSDDCVTLMIKKE  
CEYMCADDYLEKLKNGEFDLGEREQILDWICQVHSHFKFGPLCLYLSVNYLDRFLSVFEL  
PEERAWTIQLLAIAACVSIAAKLEEVEVPLSEDLQIEGTQFEFEASTIQRMELVVMKTLNWR  
MHA VTPFSFIDYFLKKIDGDQIASKSIMFKATNLIIGTLKGIDFLKFKPSEIAAAVAIYVVVK  
NKTGGIEDAISTLIQQVEKDKVNKCVDLIKESLLSDFGASTLMVPPSPTGVWDVASSSDM  
SDDDSGPSSLDG

>SiCycD3;1

MAIENNDQSFFLDVLYCEEEEEKWDLLEDEEGVIINPLLLSSEGTTKTNSLLLLPLLLLEQ  
DLFWEDEELLSLFVKEKETRCCFESFGSDPFLCSARVDVVEWILKVNAHYDFSALTALAI  
NYLDRFLSSLQFQKDKPWMTQLAAVTCLSLAAKVEETQVPLLLDFQVEDAKYVFEAKTI  
QRMELLVLSSLKWRMNPVTPLSFLDHIIRRLGLKNNVHWEFLRRCESLLLSVMIDCRFVR  
YMPSVLATAIMLHVHIHQIEPCNAIDYQNQLLGVLKISKENVNNCYELISEVSSKPITSHKRK  
YDENPSSPSGVIDPIYTSESSNDSWDLDLPSFKKSKVQEQQMKMSSSLSRVFVEAVGSPH

>SiCycD3;2

MAFVIDSLYCKDETFQVFEVKPKSVTLLNQDLIWEKEELESLLSKEEENQMYNVVINNPFL  
SVFRSEAIEWILEAVDYHNFSAQTAILAVNYLDRFLFSLQSQNHDEKQPWMNQLAAVTC  
LSLAAKIEETQVPLLLDLQVEESRYLFEPKTIQRMELLSTLKWKMNVPVTPFSFLDYFSRR  
LGLNDHICFELLRRCEKVLLSTITDCRFMCYLPSAMAAATMLHVIDKLEPCIGQEYQEQLF  
GILGVVKDNDVTDCCKLVQEVASNVDNFNSNKRKFGALPGSPMGVMDVSFSSDSSNDSWAV  
AASVFSSPEPSSKRTRPHEKEK

>SiCycD3;3

MSHHYQEQQLEAQKIPFLDLSLYCEENNILTEVSIETESFSSHDLWEEEEELTSLSKETHEY  
EISYNVLEKNQSFISSRRESVEWILKTTAYYSFSAQTGFLAVNYFDRFLLFSFNQSLNHKPW  
MNQLVAVTCLSLAAKVEETDVPLLLDLQVEESGFLFESKTIQRMEMILSTLKWKMNVPV  
PFSFLDFITRRLGLKHCLSLEFLRRCEKVLLYTITDDRFIGYLPSAMASATMLHVLDRKPC  
IGEKYQDQLLGILGIVKEKVEGCYRLIQEVACNIDFGSNKRKFGTLPGSPTGVMDMSFSSD  
YSNDSWSVATSVTSSPEPLSKKIRESE

>SiCycD3;4

MVFLDSQLQNPISALLDGLYCEEDRFLDDDLGEWSSLDVGNENVKKTLPILLECDMFEW  
HDELATLLSKENEFHLGFQSLISDGLMGARKEALDWMLRVIAYYGFTATTAVLAVNYFD  
RFVSGWCFQKDKPWMSQLAAVACLSIAAKVEETQVPLLLDLQVADSRVFVEAKTIQRM  
LLVLSTLKWKMNVLVTPLSFIDHIMRRFGFMSNLHMDFLKKCERLILDIITDSRLLHYPPSVI  
ATASMFYVINDIEPSNAMEYQNQLMSVLKVRKDIFEECHDLILELMDTACYKLCQSLKRK  
HHSVPGSPSGVIDAYFSSESSNESWSVASSISSPEPQYKRKKTQDQRM TLAPLGSNLH

>SiCycD3;5

MVSHLQVQNIEPQNPILNFDALLCKEDPLDEGDLGGGYHSDERNRNVKKISPFLECDMFW  
EDGEVETLLSKEKLNLFDCSTSLVSDGVLLGLRKKSLWMLTVIDHYGFNALTAVLAVNYF  
DRFMSRVGFQKGQPWMSQLVAVACLSIAAKVEEIQVPLLLGLQASIDECHDLILELMGTSG  
SKICQTNKRKCQSIPGTPDGVIDAYFSCSSNDSLVAASSVSSLPEPQYKRSRT

>SiCycD3;6

MVSHLQVQNIEPQNPILNFDALLCKEDPLDEGDLGGGYHSDERNWNVKKISPLLECDMF  
WEDGEVETLLSKEKLNLFDCSTSLVSDGVLLGLRKKSLWMLTVIDHYGFNALTAVLAVNY  
FDRFMSRVGFQKGQPWMSQLVAVACLSIAAKVEEIQVPLLLGLQVSNPKYVFEAKTIKNE  
LLVLSTLKWKMNPVTPLSFIDHIIRRFQLMTNLHSEFHRKCENIILGIITDSRLLHYPPSVFAI  
ATLFYAINIEPCNALDYLNQFMAIFKVRKASIDECHDLILELMGTSGSKICQTNKRKCQSI  
RGTPDGIIDAYFSCSSNDSLVAASSVSSLPDPQYKRSRT

>SiCycD3;7

MVSHLQVQNIEPQNPILNFDALLCKEDPLDEGDLGGGYHSDERNWNVKKISPLLECDMF  
WEDGEVETLLSKEKLNLFDCSTSLVSDGVLLGLRKKSLWMLTVIDHYGFNALTAVLAVNY  
FDRFMSRVGFQKGQPWMSQLVAVACLSIAAKVEEIQVPLLLGLQASIDECHDLILELMGTSG  
GSKICQTNKRKCQSIPGTPDGVIDAYFSCSSNDSMVVASSVSSLPDPQYKRSRT

>SiCycD4;1

MGENSNDLLLCTETKNLCFDDLDLANDDQKIQEKS KVLNFDYGRSVALIDLLPCLSEESF  
SVMLEREKVFLPKDDYLKRLRIGDLNLHRREAVNWIWKAHVHYGFGELSFCLSINYLD  
RFLSLYELPRGKIWTIQLLAVACLSLAVKMEEINVPLTVDLQVGEPKFLFEGKTIQRMELLV  
LSTLRWRMQAYTPCTFIDYFMRKMNLDEFPSMRLVSRSIQLILSIIKGIDFLEFRSSEIAADR  
VMKCFELIQDLTLVSGTSATAAAAATSVPTNGVLEAACLSYKSGEGTVLSCQNAKRRK  
LDTNIIS

>SiCycD4;2

MDENKDLLCTETESFDFDDLGS LGIGQKKNEINN KDLIFGKNRSRSEVLIDLPKISEESFSF  
MVKREIDFLPKDDYLKRLRSGDLDSVRREAI DWIWKACMHFGYGKLNFCLSINYLD RF  
LSLYELPRGKTWAVQLLAVACLSIAVKMEEIHVPLIVDLQVGNPKFVFEGKTIQRMELLVLT  
TLKWRMLAYTPCTFIDYFVRKMND DQIPSERLISKAIQLILCSIRGIDFLEFRSSEIAAAVAIS  
VSKEMQANDIDKAMPCFIHVQKGRVMKCLELIQDLTLVSGTVTTATTITTASVPKSPNGV  
LEAACLSYKSDESIVGSQTSPENKRRKLDTSLQEGT

>SiCycD5;1

MAPSMDCAVSSLLCAEDNSSIFCNEDDDVGFGFVEEVVGEDIWYPRIHRNGQENRKL FNG  
DEFYTGVP LQSDECLVLMIEKECEHMPAVDYLERLRNGDLDIGARDEILDWIAKVHSQFN  
FGPMCAYLAVNYLDRFLSAYDLPKEKAWMMQLLGVACLSIAAKMEETDVPLSLDLQGGD  
AKFVFEAKTIQRMELLVLTTLKWRMQAITPFSYIDYFIKKINNSDQISSINKSVELILSTLKGI  
NFLEFKPSVIAAAVAISFAVKTETLDSEKALSALVQH VQKDKVMKCVELIQALSLASDFVK  
VPIASSIPSV PQSPIGVLDAAACLSYTS DGS GSVESRSNSSHNSPVKRRKLNT

>SiCycD6;1

MEFDLENPLPFSHDETHFDTISPLFNIEAHHMPSKTYFQILINSNFLINIREATISKILQISQPF  
DSHFLPYLAINYLDRFLSFHSLSDAKPWILNLIGVSCVSLAFKMKKTEYSVTDIQQDAGSIF  
DIETIKRMELLILGSLKWRMRSITAFAFINFFISSFKFDLPFQQALKARATEIIFTSQNEIKIL  
QFKPSTISASALLCASHFLPQFSCYKTAIINCSYVHKDDLSCCNVIQEITKKEYESILEIV  
SSTSTPVNVLDVQMSWSSDNEPIEEDSSVNAISSRQDNLT KRRKIITTIIDDNT

>SiCycD6;2

MKFDLENPLTAFDGDNDVVSALFAAESDHTPSFKSTDVHSSIRNHCFTLISQAQFSCD  
IDRFAAYLAVNYIDRFLSKQLILENKPWIIRILVTASLSLAAKMRNINNLPISHIIPVSNSSL  
DQSEHRDNEGLIFNLQSVHRMENLILTTLNWRLRSITPFAFLQFFNSLFELSNNQSLQSLE  
DRASDVIFISHYEIKLVEYKPSVLASSAFLCAAHELIPQQVPFFLDAINSKCGHIYKEEVLNC  
WNVMMREVSVDVVCSSTLPNSVLDQESTSENADRNNSSKKRRLNDFRNNQTFYISQVQH  
Y

>SiCycD6;3

MEFDLQNPLTGFEYHFDVSAFANESDHMPDFKSTDVRFSLRRHSVFLISQVQSSY  
KFDGYIAYLAVNYIDRFLSKQAVLENKPWIVRILVIVSLSLAAKMRNVDSLSDIQRDVGL  
NFDARSIRHMESLILDTLKWRLRSITPFSFLHFFNSFLKLGDSSTLRSKQRASDIIFSTQYEI  
KLFVYKPSIIAASALLRAAEELIPLQYSSCLAAISENQYSNKEELMNALAVMREMPIEGREY  
CSKLTTPKSVLECEHTSSQCETQDKDNIKKRRLSDIRDDQTFQISQVQWC

>SiCycD7;1

MESSEYLTEEEDEEMQQENGVNDDDDDDNNSNDDDIQLISREITDVRLENDQEVEELVND  
NWNQEIRTHAIRYISRTGRQFRMSRRTIYRAAMYVDRFLAQMRLENGMLWAVRLLAVTCL  
ALSAKMNDNIDDVPSLSEYPLGPYEINVNHITRMERLVLDQFSWNMNCVTPFDGFFVS  
RFCRDVTRLHITRITTARIIMIALRDLCLMNRHPSVIAAAATLLAVNRDFTIQELVMEINDLP  
INGFLQMDHNFDLAVTCLSLSAKMENIDVPPYPVGAYNINVNAIRRMEILVFC

>SiCycH1;1

MADFVTSTHRTKWIFTPQDIKHKYK VANHRAKQALEKYGTTRMEVDIDGSFSYAESQND  
TKDNAEKRPKPLKVEEEQLLKAFYEFKIQDVCDFAKFPRKIQATALIYFKRFYLLWSVME  
HHPKDIMLTCIYAACKAEENHVSAAELGKGIGQDHHVILNNEMLVFQSLGFDLIAYAPYRA  
LEGFISNLEEFCAQDNDQLLALKGALDTARIEADKIMRSDGPLLFPQGQLALTALHRADA  
AHGIFDFERYLRSVLSHHDQPGHAISELTDSINVIDSLVGKLLTPTSKDVKHIDRKLKSCLD  
PGSHDKSKKRKHRSKDSSNEVTDIS

>SiCycH1;2

MADFVTSTHRTKWIFTPQDIKHKYK VANHRAKQALEKYGTTRMEVDIDGSFSYAESQND  
AKDNAEKRPKPLKVEEEQLLKAFYEFKIQDVCDFAKFPRKIQATALIYFKRFYLQWSVME  
HHPKDIMLTCIYAACKAEENHVSAAELGKGIGQDHHVILNNEMLVFQSLGFDLIVYSPYRA  
LEGFISDLEEFCAKDEDQLVALKGS�DTARIEADKIMRSDGPLLFPQGQLALTALHRANA  
VHSIFDFERYLRSVLSRYQPAHAISELTGSIDAIDSLIGKLLTPTSKDVKHVDRKLKSCLDPG  
SHDKSKKRKHRSKDSSHEATDLS

>SiCycL1;1

MIYTAIDTFYLAEEQLVESPSRKDGIDDVTTETALRIYGCDLVQECGILLRLPQAVMATGQVL  
FHRFYCKKSFAFNVKRVAAASCVWLASKLEESPRKARQVLVVFHRMECRRENLPIEHLD  
SSKKYVDLKAIDLIRTERHLLKEMGFICHVEHPHKFISNYLATLETPAELRQEAWNLANDSL  
RTTLCVRFKSEVVACGVVYAAARRFQVPLPENPPWWKAFDADKAGIDEVCRVLAHLVSL  
PKAKYIPVCKEGGSFATSNRSRDSPLSPVSKEGLLDAPPVNEDTEEVAKEADTKAVLDK  
DSKKSDDDSKNMPSEGESKEEPGRTDHRIDAGGEKNKDREKDRGRDRERERDKERLKS  
ERDRGRESRDRDRDDFERDREKSKERSHRSRDKGHSEKPKHQSSRDRDYLSYSREKDR  
RRHH

>SiCycU1;1

MLHEGGSDEFHRRPDPSADDVATPRVLTLISYVLEKLVARNDQLLLLGRQVGHDNELMSN  
GAGGPRRVLGKNFNAFHGVRAPNISIPKYLERLYKYTNCSPSCFVVGYVYIDRLGHKYPD

SLLVSLNVHRLLVTSVMVASKMLDDAHYNNAFYARVGGVSNAELNKLELELLFLLDFGV  
NMSARVFESYCQYLEREMLSNGPTLKIEKSAINSITTSTVDDATEISVEDIDHTSSPSQLLD

>SiCycU2;1

MANISPRKLRDDLYCYSYEQDSNIPLVISVLASLIERNLARNERIAKNCTWALSKNVTRTVF  
DCHETPDMTIQSYLERIFRYTRAGPSVYVYVAYVYIDRFCQLYPHFRISPRNVHRLITTIMV  
ASKYVEDMNYRNSYFARVGGGLTTNEMNKLEMEFVFMGMGFKFHVNVSVFESYCCHLERE  
VSIGGGYEIERTLRCAEEIKSKQIEERSCCSQITRVLL

>SiCycU3;1

MITISNRKVFYSDICYKLLDMGTLAPEPEVTCSKQYLALGLKISGKEKSGKPRVLSLLSTLL  
ERSVQNNESLLESSQSEDVITIFHGSRAPSLNIEQYLDRIYKYSCCSPSCFVVAHIYMERFIE  
CTSAHLTSLNVHRLLLITSVMVAAKFIDDAFYNNAYYARVGGVTTKELNKLEMKFLFGLDF  
QLHVNVPFTGFSYCSLIEKEGTVGLQIERSIQACRISWSNKKDDSKCAQIAR

>SiCycU3;2

MIMGAEGFGTKSGISKTYTNMGLNEYDRGDKGNPKILWIVASVIERSVQKNEKGLKGSNK  
RGVVTVFHGTAPVLTQYIERIFKYSNCSPSCFVVAIYLERFLNLTDCLLTSNVHRL  
ITSIMLAVKFVDDDCYNNAYYAKVGGITTRELNKLEVKFLAALDFRLHVSVESFDKYCLQ  
LEKDSNEKLQIDRPIRIFAWGKGLVNKNISNGSPTVGGYSCRAF

>SiCycU4;1

MAELEIQNQNLMPKLIDYLSLLQ RVAEANDINGRFQPQKISVFHGLTRPNISIQSYLERIFK  
YANCSPCCFVVAIVYLDLDRFTQCQPSLPINSFNIHRLLLITSVMIAAKFMDDMYNNAYYAK  
VGGISITEMNFLEVDLFLGLGFHLNVTPTTFQTYCAYLQKEMLMQSPPMNFEDSSLFIGRS  
PKLQYICFNEDESSSQQLVV

>SiCycU4;2

MGEIDKCDEEMPKFLNLMACVVERVAERNDVKSRSKISIFDGLSRPTISVQSYLERIFKYA  
NCSPSCFIVAIYLDLDRFSQMQLLPINSFNVHRLLLITSVLVSAKFMDIDFYNNGYGKVGGI  
STREMNLLEVDLFLGIGFQLNVTPTTFHTYCSYLHTEMLMLEIPMPLKIVNQYCYVND  
ESSTHELDVSQII

>SiCycT1;1

MAGLMTGDPSTHHEAYEGGSFRASQERPDENGGRWYLSRKEIEENSPSRLNGIDLKKETY  
LRKSYCTFLQDLGMRLKVPQVTIATAIIFCHRFFLRQSHSRNDRRTVATVCMFLAGKVEET  
PRPLKDVILVSYEIIHKKDSEAIQRIKQKEVYEQQKELILSGERVVLATLAFDLNVHHPYKP  
LVEAIKKFKVAQNALAQVAVNFVNDGLRTSLCLQFKPHHIAAGAIFLAAKFLKVKLPDGDG  
EKVWWQEFVDVTPRQLEEVSNQMLELYEQNRVPPQASEAEGSAGGNQRPSGKSSAAQEEH  
GANNNSVGGGANTNAGSSNPASSRETPDQPYADNHSGLTRTAQNSNNDYGSAEHNFS  
GIGDGEMNDRQTHEREQVSYQGSTAQVQSRQSRYSSESNTEDDQEGNTRKSEPRHKGESK  
EKYHGRALENMDDAVGQSPQEVKIDKDKVKA AVENKVKA ALEKRRKAQGDVTKKTD  
VMDDDDLIERELEDDGIELSAGNEKNKRERKESWSKPSNRPEHENTYHTKLQDEAGDGH  
QGSKWKSSRREELDYVEEGELEPYDDADKGYRSPKSNRKRKAGSPDKPMEGKRHEYF  
PDDRNRPGRLDYSERDHKRHMQENHA

>SiCycT1;2

MVHSSAYNNYNTVDTHFFNSNSSHDVGRNFSEYSYGYDNLIKPEAEPSSKRRRCSTSGWE  
SSGRYSQAPYACNDVPSKRQSTCYNVPLRNSRAYDDAYPVRNNNSATTSKPRSDASAPTC  
SKRDRSWLEDTEEDNIFMSKEEIEKCSPSRKDGIDAMHEAHLRYSYCAFLQNLGIRLDLPQ  
TTIGTAMVLCHRFFVRRSHACHDRFLIATAALFLAAKSEETARPLNNVLKASCEIFHKQDL



AVLSYFLPVDWFEQYRERITEAEQMILTTLNFELTVQHPYESLTSTLEKLGSETVLVNLAL  
HLVSEGLRSSLWLQFKPYQIAAGAAYLASKFLNMDFASHHSVWKEFQTSPNVLRDVAQQ  
LMELF

>SlCycT1;3

MHIQEKSVSYTQRWYFTTEEIEDHSPSRRDGIDYEKESHLRKLYCVFLQELGIELKVPQVTI  
ATAMMLCHRFYMRQSHAKNHWQIVATVSMFLAGKAEETPRWLSDLVVVAYKLVIKWDP  
SAPLRIRQKDIYDKEKESVVAGERMLLVTVAFDLSIQHPYKALVAAMKRLEISNNEMVKVA  
WNFVNDWLR TTLCLQYKPHYVAAGSMFLAAKFLKVKLPAKKGNPWWMQFDVAPKKLE  
EVIQKMLQLLEQNQKQVTPSTSSKLTESKPVAEKATSSIAESCISSVSVVAQESRNIGLVKTR  
GLSTSVTSKFIEKASCNSINTVKEETEHWETSECGSANS AVENGVCQPVKNEGGKEICHAV  
SVSDHNGKFDIDRIKERLKRRKLEQSSMKKSSMYDEIDSEGWIERELENLE

>SDS

MKRKLHAEAVQPAVQQPKEILPAVKRQLRSKLPRRKRS HISPILRSFSIAASSYLTSEVSRQS  
SKGSVNKEVKKREIEGEEFRITRAYFRKKLLVDQKKDSEVELSECSCVDS CSEVIGKIIKIE  
DPVDISRDIVSKRNRNAKVIEGTEDSEVISRFLKASGGFCGESSKSGEDAVARSRNAAKIIH  
EDVVSFNSVLQSPSESKCGNLSVQSIKCSENRAAEVESEVSRVCPEVELSAVEQAHEKLV  
EAELDLECSENFSIVDVSDDYSSAYSELQSEIFPESSDIDISDYSPSYWYDSGSQFSEKSNAD  
ASPSPTFTLFLRFGQQFCRSTAALQSTPINSSSEDQISTEFTGLEDEEDEESYRMIRNRERRQL  
YLHDYAE EYCSTTDYGDLIVQQRLQMVHWILEQATR KDLQKETMFLSVNLFDRFLSKGY  
FKTKRCLQIAGIACLTAVRIEENQPFNSIRQKTFSVAGTTYSCSEVVAMEWL VQEVLNFQC  
FLPTIYNFLWFY LKAATATEYMEKTAKYLAVLALLGHEHLCYRPSTVASALVILALSAANL  
YASCHLVTKTHAKIEDEDLPECIKVLYPYLAIFSSSCFSAEKQAESEFCIIKAMILVNEVTAFS  
LSKKLFNSGIFIHDRAWNGW

>J18

MKKEVCFCLLARLVEFLIQSAQDLQVSPIVKYSALSLFADRFYPSLTGEGTKDAKSWLLQP  
LRESNLQLFALVAIWISSKIHDSPSLSVKSFKSLADNIIKEQHFTTKDFLEAELV LMEVLKFEI  
GMKSIPFRFFEDLLLKFSEVARV GKQLSLEACMDIMDLVYEKGKISSFNCSSHHLAASIVVA  
AYAITVPLQQSEFPILLWVKFVTSCKEEDIVVTVKNILMYVFEA
